# Supplementary material for: Therapeutic Benefit in Allergic Dermatitis Derived from the Inhibitory Effect of Byakkokaninjinto on the Migration of Plasmacytoid Dendritic Cells
Source: Hindawi journal article supplement (doi:10.1155/2020/9532475), 2020-01-01
Supplement: f1 [file 9532475.f1.zip]

# 1 Supplemental Figure

Supplemental Figure 1.

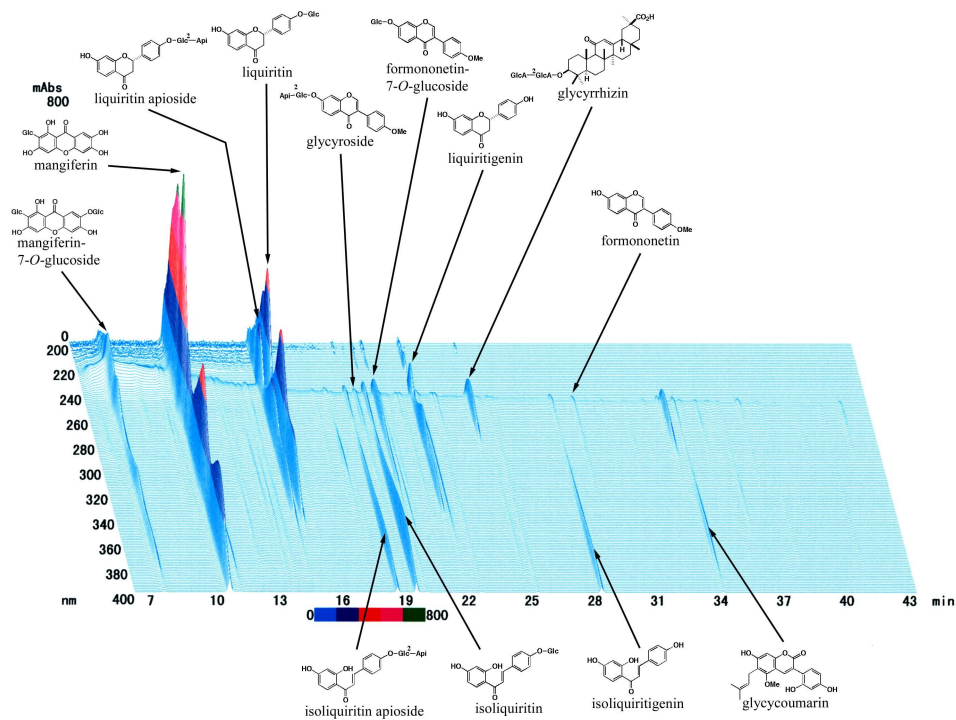

2

3

4 **Supplemental Figure 1.** Chemical profile of byakkokaninjinto analyzed by 3D-HPLC.

5 Each peak of byakkokaninjinto in the HPLC profile was identified by comparison of the

6 retention times and UV spectra of chemically defined standard compounds. This 3D-HPLC

7 data was created by Tsumura Co..

8
