# Supplementary material for: Therapeutic Benefit in Allergic Dermatitis Derived from the Inhibitory Effect of Byakkokaninjinto on the Migration of Plasmacytoid Dendritic Cells
Source: Evid Based Complement Alternat Med. 2020 Oct 22;2020:9532475. doi: 10.1155/2020/9532475 (PMC7603581; doi:10.1155/2020/9532475)
Supplement: Supplementary Materials — Supplementary Figure 1: chemical profile of byakkokaninjinto analyzed by 3D-HPLC. Supplemental Table 1: components of 86 kinds of Kampo prescriptions. Supplemental Table 2: the details of herbal extracts in 86 kinds of Kampo prescriptions. [file 9532475.f1.zip]

Archive with 8 entries (8 files):
- Supplementary materials/._.DS_Store
- Supplementary materials/._Supplemental Figure 1.pdf
- Supplementary materials/._Supplemental Table 1.docx
- Supplementary materials/._Supplemental Table 2.xlsx
- Supplementary materials/.DS_Store
- Supplementary materials/Supplemental Figure 1.pdf
- Supplementary materials/Supplemental Table 1.docx
- Supplementary materials/Supplemental Table 2.xlsx
