# Supplementary material for: Therapeutic Benefit in Allergic Dermatitis Derived from the Inhibitory Effect of Byakkokaninjinto on the Migration of Plasmacytoid Dendritic Cells
Source: Evid Based Complement Alternat Med. 2020 Oct 22;2020:9532475. doi: 10.1155/2020/9532475 (PMC7603581; doi:10.1155/2020/9532475)
Supplement: Supplementary Materials — Supplementary Figure 1: chemical profile of byakkokaninjinto analyzed by 3D-HPLC. Supplemental Table 1: components of 86 kinds of Kampo prescriptions. Supplemental Table 2: the details of herbal extracts in 86 kinds of Kampo prescriptions. [file 9532475.f1.zip › Supplementary materials/Supplemental Table 2.xlsx]

## Sheet:  Supplemental Table 2
Supplemental Table 2. Details of component extracts in 86 kinds of Kampo prescriptions
No	Latin name	English name	Origin name	Database URL
1	Achyranthis Radix	Achyranthes Root	Achyranthes bidentata Blume	http://dentomed.toyama-wakan.net/en/information_on_experimental_crude_drug_extracts/Achyranthes%20Root%20Extract-2015/EXC025006
2	Aconiti Radix	Aconite Root	Aconitum carmichaeli Debeaux	https://dentomed.toyama-wakan.net/en/scientific_information_on_crude_drugs/Aconite%20Root/SCC000148
3	Akebiae Caulis	Akebia Stem	Akebia quinata Decaisne	https://dentomed.toyama-wakan.net/en/scientific_information_on_crude_drugs/Akebia%20Stem/SCC000144
4	Alismatis Tuber	Alisma Tuber	Alisma plantago-aquatica subsp. orientale (Sam.) Sam.	http://dentomed.toyama-wakan.net/en/information_on_experimental_crude_drug_extracts/Alisma%20Rhizome%20Extract-2015/EXC052006
5	Alpiniae Officinari Rhizoma	Alpinia Officinarum Rhizome	Alpinia officinarum Hance	http://dentomed.toyama-wakan.net/en/information_on_experimental_crude_drug_extracts/Alpinia%20Officinarum%20Rhizome%20Extract-2015/EXC119006
6	Amomi Semen	Amomum Seed	Amomum villosum var. xanthioides (Wall. ex Baker) T.L.Wu & S.J.Chen	http://dentomed.toyama-wakan.net/en/information_on_experimental_crude_drug_extracts/Amomum%20Seed%20Extract-2015/EXC127004
7	Anemarrhenae Rhizoma	Anemarrhena Rhizome	Anemarrhena asphodeloides Bunge	http://dentomed.toyama-wakan.net/en/information_on_experimental_crude_drug_extracts/Anemarrhena%20Rhizome%20Extract-2015/EXC054006
8	Angelicae Acutilobae Radix	Japanese Angelica Root	Angelica acutiloba (Siebold & Zucc.) Kitag.	http://dentomed.toyama-wakan.net/en/information_on_experimental_crude_drug_extracts/Japanese%20Angelica%20Root%20Extract-2015/EXC061006
9	Angelicae Dahuricae Radix	Angelica Dahurica Root	Angelica dahurica (Hoffm.) Benth. & Hook.f. ex Franch. & Sav.	http://dentomed.toyama-wakan.net/en/information_on_experimental_crude_drug_extracts/Angelica%20Dahurica%20Root%20Extract-2015/EXC068006
10	Araliae Cordatae Rhizoma	Aralia Rhizome	Angelica pubescens Maximowicz	http://dentomed.toyama-wakan.net/en/information_on_experimental_crude_drug_extracts/Angelica%20Pubescens%20Root%20Extract-2015/EXC104008
11	Arctii Fructus	Burdock Fruit	Arctium lappa Linne	http://dentomed.toyama-wakan.net/en/information_on_experimental_crude_drug_extracts/Burdock%20Fruit%20Extract-2015/EXC027006
12	Armeniacae Semen	Apricot Kernel	Prunus armeniaca Linne	http://dentomed.toyama-wakan.net/en/information_on_experimental_crude_drug_extracts/Apricot%20Kernel%20Extract-2015/EXC018006
13	Artemisiae Capillaris Flos	Artemisia Capillaris Flower	Artemisia capillaris Thunberg	http://dentomed.toyama-wakan.net/en/information_on_experimental_crude_drug_extracts/Artemisia%20Capillaris%20Flower%20Extract-2015/EXC001006
14	Artemisiae Folium	Artemisia Leaf	Artemisia argyi Léveillé et Vaniot	http://dentomed.toyama-wakan.net/en/information_on_experimental_crude_drug_extracts/Artemisia%20Leaf%20Extract-2015/EXC083006
15	Asiasari Radix	Asiasarum Root	Asarum sieboldii Miq.	http://dentomed.toyama-wakan.net/en/information_on_experimental_crude_drug_extracts/Asiasarum%20Root%20Extract-2015/EXC030006
16	Asini Corii Collas	Donkey Glue	Equus asinus Linné	https://dentomed.toyama-wakan.net/en/scientific_information_on_crude_drugs/Donkey%20Glue/SCC000134
17	Asparagi Radix	Asparagus Root	Asparagus cochinchinensis Merrill	http://dentomed.toyama-wakan.net/en/information_on_experimental_crude_drug_extracts/Asparagus%20Tuber%20Extract-2015/EXC060006
18	Astragali Radix	Astragalus Root	Astragalus mongholicus Bunge	http://dentomed.toyama-wakan.net/en/information_on_experimental_crude_drug_extracts/Astragalus%20Root%20Extract-2015/EXC004006
19	Atractylodis Lanceae Rhizoma	Atractylodes Lancea Rhizome	Atractylodes lancea De Candolle	http://dentomed.toyama-wakan.net/en/information_on_experimental_crude_drug_extracts/Atractylodes%20Lancea%20Rhizome%20Extract-2015/EXC047006
20	Atractylodis Rhizoma	Atractylodes Rhizome	Atractylodes japonica Koidz. ex Kitam.	http://dentomed.toyama-wakan.net/en/information_on_experimental_crude_drug_extracts/Atractylodes%20Rhizome%20Extract-2015/EXC069007
21	Aurantii Fructus Immaturus	Immature Orange	Citrus × aurantium L.	http://dentomed.toyama-wakan.net/en/information_on_experimental_crude_drug_extracts/Immature%20Orange%20Extract-2015/EXC016006
22	Aurantii Pericarpium	Bitter Orange Peel	Citrus aurantium Linné	https://dentomed.toyama-wakan.net/en/scientific_information_on_crude_drugs/Bitter%20Orange%20Peel/SCC000200
23	Bambusae Caulis	Bamboo Culm	Bambusa tuldoides Munro	https://dentomed.toyama-wakan.net/en/scientific_information_on_crude_drugs/Bamboo%20Culm/SCC000129
24	Benincasae Semen	Benincasa Seed	Benincasa hispida (Thunb.) Cogn	http://dentomed.toyama-wakan.net/en/information_on_experimental_crude_drug_extracts/Benincasa%20Seed%20Extract-2015/EXC142004
25	Bupleuri Radix	Bupleurum Root	Bupleurum falcatum Linné	http://dentomed.toyama-wakan.net/en/information_on_experimental_crude_drug_extracts/Bupleurum%20Root%20Extract-2015/EXC029006
26	Cannabidis Fructus	Hemp Fruit	Cannabis sativa Linné	https://dentomed.toyama-wakan.net/en/scientific_information_on_crude_drugs/Hemp%20Fruit/SCC000077
27	Chrysanthemi Flos	Chrysanthemum Flower	Chrysanthemum morifolium Ramatulle	http://dentomed.toyama-wakan.net/en/information_on_experimental_crude_drug_extracts/Chrysanthemum%20Flower%20Extract-2015/EXC015006
28	Cicadae Periostracum	Cicada Slough	Cryptotympana atrata Stal	https://dentomed.toyama-wakan.net/en/scientific_information_on_crude_drugs/Cicada%20Slough/SCC000141
29	Cimicifugae Rhizoma	Cimicifuga Rhizome	Actaea dahurica (Turcz. ex Fisch. & C.A.Mey.) Franch.	http://dentomed.toyama-wakan.net/en/information_on_experimental_crude_drug_extracts/Cimicifuga%20Rhizome%20Extract-2015/EXC043006
30	Cinnamomi Cortex	Cassia Bark	Cinnamomum cassia Blume	http://dentomed.toyama-wakan.net/en/information_on_experimental_crude_drug_extracts/Cassia%20Bark%20Extract-2015/EXC021010
31	Citri Unshiu Pericarpium	Citrus Unshiu Peel	Citrus reticulata Blanco	http://dentomed.toyama-wakan.net/en/information_on_experimental_crude_drug_extracts/Citrus%20Unshiu%20Peel%20Extract-2015/EXC058007
32	Clematidis Radix	Clematis Root	Clematis chinensis Osbeck	http://dentomed.toyama-wakan.net/en/information_on_experimental_crude_drug_extracts/Clematis%20Root-2015-1/EXC135004
33	Cnidii Rhizoma	Cnidium Rhizome	Ligusticum officinale (Makino) Kitag	http://dentomed.toyama-wakan.net/en/information_on_experimental_crude_drug_extracts/Cnidium%20Rhizome%20Extract-2015/EXC046006
34	Coicis Semen	Coix Seed	Coix lacryma-jobi Linne	http://dentomed.toyama-wakan.net/en/information_on_experimental_crude_drug_extracts/Coix%20Seed%20Extract-2015/EXC078006
35	Coptidis Rhizoma	Coptis Rhizome	Coptis japonica Makino	http://dentomed.toyama-wakan.net/en/information_on_experimental_crude_drug_extracts/Coptis%20Rhizome%20Extract-2015/EXC007007
36	Corni Fructus	Cornus Fruit	Cornus officinalis Siebold & Zuccarini	http://dentomed.toyama-wakan.net/en/information_on_experimental_crude_drug_extracts/Cornus%20Fruit%20Extract-2015/EXC033006
37	Cornus Fruit	Cornus Fruit	Cornus officinalis Siebold et Zuccarini	https://dentomed.toyama-wakan.net/en/scientific_information_on_crude_drugs/Cornus%20Fruit/SCC000033
38	Corydalis Tuber	Corydails Tuber	Corydalis yanhusuo (Y.H.Chou & Chun C.Hsu) W.T.Wang ex Z.Y.Su & C.Y.Wu	http://dentomed.toyama-wakan.net/en/information_on_experimental_crude_drug_extracts/Corydails%20Tuber%20Extract-2015/EXC003006
39	Cyperi Rhizoma	Cyperus Rhizome	Cyperus rotundus Linné	http://dentomed.toyama-wakan.net/en/information_on_experimental_crude_drug_extracts/Cyperus%20Rhizome%20Extract-2015/EXC023006
40	Dioscoreae Rhizoma	Dioscorea Rhizome	Dioscorea japonica Thunberg	http://dentomed.toyama-wakan.net/en/information_on_experimental_crude_drug_extracts/Dioscorea%20Rhizome%20Extract-2015/EXC126004
41	Ephedrae Herba	Ephedra Herb	Ephedra sinica Stapf	http://dentomed.toyama-wakan.net/en/information_on_experimental_crude_drug_extracts/Ephedra%20Herb%20Extract-2015/EXC076006
42	Eucommiae Cortex	Eucommia Bark	Eucommia ulmoides Oliver	http://dentomed.toyama-wakan.net/en/information_on_experimental_crude_drug_extracts/Eucommia%20Bark%20Extract-2015/EXC105006
43	Euodiae Fructus	Euodia Fruit	Tetradium ruticarpum (A.Juss.) T.G.Hartley	http://dentomed.toyama-wakan.net/en/information_on_experimental_crude_drug_extracts/Euodia%20Fruit%20Extract-2015/EXC026006
44	Foeniculi Fructus	Fennel	Foeniculum vulgare Miller	https://dentomed.toyama-wakan.net/en/scientific_information_on_crude_drugs/Fennel/SCC000121
45	Forsythiae Fructus	Forsythia Fruit	Forsythia suspensa (Thunb.) Vahl	http://dentomed.toyama-wakan.net/en/information_on_experimental_crude_drug_extracts/Forsythia%20Fruit%20Extract-2015/EXC080006
46	Fossilia Ossis Mastodi	Longgu	Rhinoceros sinensis Owen	https://dentomed.toyama-wakan.net/en/scientific_information_on_crude_drugs/Longgu/SCC000132
47	Fritillariae Bulbus	Fritillaria Bulb	Fritillaria verticillata Willdenow	http://dentomed.toyama-wakan.net/en/information_on_experimental_crude_drug_extracts/Fritillaria%20Bulb%20Extract-2015/EXC064006
48	Fructus Hordei Germinatus	Germinated Barley	Hordeum vulgare Linné	https://dentomed.toyama-wakan.net/en/scientific_information_on_crude_drugs/Malt/SCC000143
49	Gardeniae Fructus	Gardenia Fruit	Gardenia jasminoides Ellis	http://dentomed.toyama-wakan.net/en/information_on_experimental_crude_drug_extracts/Gardenia%20Fruit%20Extract-2015/EXC032006
50	Gastrodiae Tuber	Gastrodia Tuber	Gastrodia elata Blume	http://dentomed.toyama-wakan.net/en/information_on_experimental_crude_drug_extracts/Gastrodia%20Tuber%20Extract-2015/EXC059006
51	Gentianae Scabrae Radix	Japanese Gentian	Gentiana scabra Bunge	http://dentomed.toyama-wakan.net/en/information_on_experimental_crude_drug_extracts/Japanese%20Gentian%20Extract-2015/EXC079006
52	Ginseng Radix	Ginseng	Panax ginseng C. A. Meyer	http://dentomed.toyama-wakan.net/en/information_on_experimental_crude_drug_extracts/Ginseng%20Extract-2015/EXC063008
53	Glycyrrhizae Radix	Glycyrrhiza	Glycyrrhiza uralensis Fischer	http://dentomed.toyama-wakan.net/en/information_on_experimental_crude_drug_extracts/Glycyrrhiza%20Extract-2015/EXC013008
54	Glycyrrhizae Radix Praeparata	Prepared Glycyrrhiza	Glycyrrhiza uralensis Fischer	https://dentomed.toyama-wakan.net/en/scientific_information_on_crude_drugs/Prepared%20Glycyrrhiza/SCC000138
55	Gypsum Fibrosum	Gypsum	Natural hydrous calcium sulfate	https://dentomed.toyama-wakan.net/en/scientific_information_on_crude_drugs/Gypsum/SCC000128
56	Kasseki	Aluminum Silicate Hydrate with Silicon Dioxide	Aluminum Silicate Hydrate with Silicon Dioxide	https://dentomed.toyama-wakan.net/en/scientific_information_on_crude_drugs/Aluminum%20Silicate%20Hydrate%20with%20Silicon%20Dioxide/SCC000122
57	Koi	Koi	Zea mays Linné (Gramineae)	https://dentomed.toyama-wakan.net/en/scientific_information_on_crude_drugs/Koi/SCC000124
58	Longan Arillus	Longan Aril	Euphoria longana Lamarck	https://dentomed.toyama-wakan.net/en/scientific_information_on_crude_drugs/Longan%20Aril/SCC000133
59	Lycii Cortex	Lycium Bark	Lycium chinense Miller	http://dentomed.toyama-wakan.net/en/information_on_experimental_crude_drug_extracts/Lycium%20Bark%20Extract-2015/EXC038006
60	Magnoliae Cortex	Magnolia Bark	Magnolia obovata Thunberg	http://dentomed.toyama-wakan.net/en/information_on_experimental_crude_drug_extracts/Magnolia%20Bark%20Extract-2015/EXC024006
61	Massa Medicata Fermentata	Malted Rice	Oryza sativa Linné	https://dentomed.toyama-wakan.net/en/scientific_information_on_crude_drugs/Shinkiku/SCC000140
62	Menthae Herba	Mentha Herb	Mentha arvensis Linné	http://dentomed.toyama-wakan.net/en/information_on_experimental_crude_drug_extracts/Mentha%20Herb%20Extract-2015/EXC066006
63	Mori Cortex	Mulberry Bark	Morus alba Linne	http://dentomed.toyama-wakan.net/en/information_on_experimental_crude_drug_extracts/Mulberry%20Bark%20Extract-2015/EXC048006
64	Moutan Cortex	Moutan Bark	Paeonia suffruticosa Andrews	http://dentomed.toyama-wakan.net/en/information_on_experimental_crude_drug_extracts/Moutan%20Bark%20Extract-2015/EXC075006
65	Nelumbis Semen	Nelumbo Seed (Lotus Seed)	Nelumbo nucifera Gaertner	https://dentomed.toyama-wakan.net/en/scientific_information_on_crude_drugs/Nelumbo%20Seed/SCC000145
66	Notopterygii Rhizoma	Notopterygium	Notopterygium incisum K.C.Ting ex H.T.Chang	http://dentomed.toyama-wakan.net/en/information_on_experimental_crude_drug_extracts/Notopterygium%20Extract-2015/EXC017006
67	Ophiopogonis Radix	Ophiopogon Root	Ophiopogon japonicus (Thunb.) Ker Gawl.	http://dentomed.toyama-wakan.net/en/information_on_experimental_crude_drug_extracts/Ophiopogon%20Tuber%20Extract-2015/EXC065006
68	Oryzae Fructus	Brown Rice	Oryza sativa Linne	https://dentomed.toyama-wakan.net/en/scientific_information_on_crude_drugs/Brown%20Rice/SCC000125
69	Ostreae Testa	Oyster Shell	Ostrea gigas Thunberg	https://dentomed.toyama-wakan.net/en/scientific_information_on_crude_drugs/Oyster%20Shell/SCC000131
70	Paeoniae Radix	Peony Root	Paeonia lactiflora Pallas	http://dentomed.toyama-wakan.net/en/information_on_experimental_crude_drug_extracts/Peony%20Root%20Extract-2015/EXC040007
71	Perilla Herba	Perilla Herb	Perilla frutescens Britton var. acuta Kudo	https://dentomed.toyama-wakan.net/en/scientific_information_on_crude_drugs/Perilla%20Herb/SCC000049
72	Persicae Semen	Peach Kernel	Prunus persica (L.) Batsch	http://dentomed.toyama-wakan.net/en/information_on_experimental_crude_drug_extracts/Peach%20Kernel%20Extract-2015/EXC062006
73	Phellodendri Cortex	Phellodendron Bark	Phellodendron amurense Ruprecht	http://dentomed.toyama-wakan.net/en/information_on_experimental_crude_drug_extracts/Phellodendron%20Bark%20Extract-2015/EXC006007
74	Pinelliae Tuber	Pinellia Tuber	Pinellia ternata (Thunb.) Makino	http://dentomed.toyama-wakan.net/en/information_on_experimental_crude_drug_extracts/Pinellia%20Tuber%20Extract-2015/EXC067007
75	Plantaginis Semen	Plantago Seed	Plantago asiatica Linné	http://dentomed.toyama-wakan.net/en/information_on_experimental_crude_drug_extracts/Plantago%20Seed%20Extract-2015/EXC041006
76	Platycodi Radix	Platycodon Root	Platycodon grandiflorum (Jacquin) A. DC.	http://dentomed.toyama-wakan.net/en/information_on_experimental_crude_drug_extracts/Platycodon%20Root%20Extract-2015/EXC014006
77	Polygalae Radix	Polygala Root	Polygala tenuifolia Willdenow	http://dentomed.toyama-wakan.net/en/information_on_experimental_crude_drug_extracts/Polygala%20Root%20Extract-2015/EXC008006
78	Polyporus	Polyporus Sclerotium	Polyporus umbellatus Fries	http://dentomed.toyama-wakan.net/en/information_on_experimental_crude_drug_extracts/Polyporus%20Sclerotium%20Extract-2015/EXC057006
79	Poria	Poria Sclerotium	Wolfiporia cocos Ryvarden et Gilbertson	http://dentomed.toyama-wakan.net/en/information_on_experimental_crude_drug_extracts/Poria%20Sclerotium%20Extract-2015/EXC071007
80	Poria Sclerotium	Poria	Wolfiporia cocos Ryvarden et Gilbertson (Poria cocos Wolf)	https://dentomed.toyama-wakan.net/en/scientific_information_on_crude_drugs/Poria%20Sclerotium/SCC000071
81	Processi Rehmanniae Radix	Prepared Rehmannia Root	Rehmannia glutinosa Liboschitz var. purpurea Makino or Rehmannia glutinosa Liboschitz	https://dentomed.toyama-wakan.net/en/scientific_information_on_crude_drugs/Processed%20Rehmannia%20Root/SCC000039
82	Pruni Cortex	Cherry Bark	Prunus jamasakura Siebold	http://dentomed.toyama-wakan.net/en/information_on_experimental_crude_drug_extracts/Cherry%20Bark%20Extract-2015/EXC136004
83	Puerariae Radix	Pueraria Root	Pueraria montana var. lobata (Willd.) Sanjappa & Pradeep	http://dentomed.toyama-wakan.net/en/information_on_experimental_crude_drug_extracts/Pueraria%20Root%20Extract-2015/EXC010006
84	Rehmanniae Radix	Rehmannia Root	Rehmannia glutinosa (Gaertn.) DC.	http://dentomed.toyama-wakan.net/en/information_on_experimental_crude_drug_extracts/Rehmannia%20Root%20Extract-2015/EXC036006
85	Rhei Rhizoma	Rhubarb	Rheum palmatum Linne	http://dentomed.toyama-wakan.net/en/information_on_experimental_crude_drug_extracts/Rhubarb%20Extract-2015/EXC050009
86	Sal Mirabilis	Sodium Sulfate Hydrate	Sodium Sulfate Hydrate	https://dentomed.toyama-wakan.net/en/scientific_information_on_crude_drugs/Sodium%20Sulfate%20Hydrate/SCC000130
87	Saposhnikoviae Radix	Saposhnikovia Root and Rhizome	Saposhnikovia divaricata (Turcz.) Schischk.	http://dentomed.toyama-wakan.net/en/information_on_experimental_crude_drug_extracts/Saposhnikovia%20Root%20and%20Rhizome%20Extract-2015/EXC074006
88	Saussureae Radix	Saussurea Root	Aucklandia lappa DC.	http://dentomed.toyama-wakan.net/en/information_on_experimental_crude_drug_extracts/Saussurea%20Root%20Extract-2015/EXC114006
89	Schisandrae Fructus	Schisandra Fruit	Schisandra chinensis (Turcz.) Baill.	http://dentomed.toyama-wakan.net/en/information_on_experimental_crude_drug_extracts/Schisandra%20Fruit%20Extract-2015/EXC028006
90	Schizonepetae Spica	Schizonepeta Spike	Nepeta tenuifolia Benth.	http://dentomed.toyama-wakan.net/en/information_on_experimental_crude_drug_extracts/Schizonepeta%20Spike%20Extract-2015/EXC020006
91	Scrophulariae Radix	Scrophularia Root	Scrophularia ningpoensis Hemsley	http://dentomed.toyama-wakan.net/en/information_on_experimental_crude_drug_extracts/Scrophularia%20Root%20Extract-2015/EXC123004
92	Scutellariae Radix	Scutellaria Root	Scutellaria baicalensis Georgi	http://dentomed.toyama-wakan.net/en/information_on_experimental_crude_drug_extracts/Scutellaria%20Root%20Extract-2015/EXC005006
93	Sesami Semen	Sesame	Sesamum indicum Linné	http://dentomed.toyama-wakan.net/en/information_on_experimental_crude_drug_extracts/Sesame%20Extract-2015/EXC091006
94	Sinomeni Caulis et Rhizoma	Sinomenium Stem and Rhizome	Sinomenium acutum (Thunb.) Rehder & E.H.Wilson	http://dentomed.toyama-wakan.net/en/information_on_experimental_crude_drug_extracts/Sinomenium%20Stem%20and%20Rhizome%20Extract-2015/EXC073006
95	Sophorae Radix	Sophora Root	Sophora flavescens Aiton	http://dentomed.toyama-wakan.net/en/information_on_experimental_crude_drug_extracts/Sophora%20Root%20Extract-2015/EXC019006
96	Tachibana Pericarpium	Citrus Peel	Citrus tachibana Tanaka	https://dentomed.toyama-wakan.net/en/scientific_information_on_crude_drugs/Citrus%20Peel/SCC000158
97	Trichosanthis Radix	Trichosanthes Root	Trichosanthes kirilowii Maximowicz	https://dentomed.toyama-wakan.net/en/scientific_information_on_crude_drugs/Trichosanthes%20Root/SCC000011
98	Tritici Semen	Wheat Seed	Triticum aestivum Linné	https://dentomed.toyama-wakan.net/en/scientific_information_on_crude_drugs/Wheat/SCC000139
99	Uncariae Uncis Cum Ramulus	Uncaria Hook	Uncaria rhynchophylla (Miq.) Miq. ex Havil.	http://dentomed.toyama-wakan.net/en/information_on_experimental_crude_drug_extracts/Uncaria%20Hook%20Extract-2015/EXC056007
100	Zanthoxyli Piperiti Pericarpium	Japanese Zanthoxylum Peel	Zanthoxylum bungeanum Maxim.	http://dentomed.toyama-wakan.net/en/information_on_experimental_crude_drug_extracts/Zanthoxylum%20Peel%20Extract-2015/EXC034006
101	Zingiberis Processum Rhizoma	Processed Ginger	Zingiber officinale Roscoe	https://dentomed.toyama-wakan.net/en/scientific_information_on_crude_drugs/Processed%20Ginger/SCC000012
102	Zingiberis Rhizoma	Ginger	Zingiber officinale Roscoe	http://dentomed.toyama-wakan.net/en/information_on_experimental_crude_drug_extracts/Ginger%20Extract-2015/EXC042006
103	Ziziphi Fructus	Jujube	Zizyphus jujuba Miller var. inermis Rehder	http://dentomed.toyama-wakan.net/en/information_on_experimental_crude_drug_extracts/Jujube%20Extract-2015/EXC051007
104	Ziziphi Semen	Jujube Seed	Zizyphus jujuba Miller var. spinosa Hu ex H. F. Chou	http://dentomed.toyama-wakan.net/en/information_on_experimental_crude_drug_extracts/Jujube%20Seed%20Extract-2015/EXC035006
